# Supplementary material for: mTOR signalling mediates the spinal osteoblast pathotype at the curve apex in adolescent idiopathic scoliosis
Source: Research Square preprint supplement (doi:10.21203/rs.3.rs-8911774/v1), 2026-02-22
Supplement: Supplementary file 1 [file 1108b5a325e3a4dafe40161a.pdf]

**Supplementary Table 1. Primers used for RT-qPCR.**

| <b>Gene</b>   | <b>Name</b>                                       | <b>Forward</b>             | <b>Reverse</b>           |
|---------------|---------------------------------------------------|----------------------------|--------------------------|
| <b>ALPL</b>   | Tissue-nonspecific alkaline phosphatase           | ACCCCAAAGGCTTCTTCTTG       | TTGGCTTTTCCTTCATGGTG     |
| <b>BMP2</b>   | Bone morphogenic protein 2                        | CAGACCACCGGTTGGAGAGG       | CCGGGTTGTTTTCCCACTCG     |
| <b>BGLAP</b>  | Bone Gamma-Carboxyglutamate Protein (Osteocalcin) | ACACTCCTCGCCCTATTGGC       | GCACCTTTGCTGGACTCTGC     |
| <b>COL1A1</b> | Collagen, type 1, alpha 1                         | CTGCCTGGTGAGAGAGGTGG       | GGACCTTCAGAGCCTCGGG      |
| <b>SPP1</b>   | Secreted phosphoprotein 1 (Osteopontin)           | GGCCGAGGTGATAGTGTGGT       | CCACGGCTGTCCCAATCAGA     |
| <b>RUNX2</b>  | Runt-related transcription factor 2               | CAGCCACCGAGACCAACAGA       | GCTGACATGGTGTCACTGTGC    |
| <b>SP7</b>    | Sp7 Transcription Factor (Osterix)                | CCTGAGTGGAAACAGGAGTGG<br>A | AGGGAGGACGCCATCCTGA<br>G |
| <b>18S</b>    | 18S rRNA                                          | CTTAGAGGGACAAGTGGCG        | ACGCTGAGCCAGTCAGTGTA     |

Primers were designed using the 'Pick primers' tool on the NCBI Nucleotide database and validated using in silico PCR on UCSC against the GRCh37/hg19 Human Feb. 2009 Assembly.

**Supplementary Table 2. Candidates screened for effects on the hFOb cell line.**

| <b>Candidate</b>          | <b>Source</b>                     | <b>Dose</b> |
|---------------------------|-----------------------------------|-------------|
| <b>LY294004</b>           | Cell Signalling technology #9901  | 1.4 $\mu$ M |
| <b>U0126</b>              | Cell Signalling technology #9903  | 0.5 $\mu$ M |
| <b>SP600125</b>           | Sigma-Aldrich #S5567              | 40 nM       |
| <b>Losartan potassium</b> | Sigma-Aldrich #SML3269            | 20 nM       |
| <b>GF 109203 X</b>        | Cell Signalling technology #37969 | 20 nM       |
| <b>Rapamycin</b>          | Cambridge bioscience #r0161       | 1 nM        |
| <b>Calcitriol</b>         | Sigma-Aldrich #D1530              | 500 nM      |

|                                        |                                   |              |
|----------------------------------------|-----------------------------------|--------------|
| <b>Leukotriene D4</b>                  | Cambridge bioscience<br>#CAY20310 | 1 pM         |
| <b>17-<math>\beta</math>-estradiol</b> | Sigma-Aldrich #E8875              | 10 nM        |
| <b>4-OHT</b>                           | Sigma-Aldrich #H6278              | 10 $\mu$ M   |
| <b>D-AP5</b>                           | Sigma-Aldrich #A8054              | 0.46 $\mu$ M |
| <b>Kainic acid</b>                     | Tocris #7065                      | 7.4 $\mu$ M  |
